# Supplementary material
Source: MDPI journal article supplement (https://www.mdpi.com/2073-4441/15/11/1977)
Supplement: s1 [file s1]

## Supporting Information

# Impact of Dissolved Oxygen on the Performance and Microbial Dynamics in Side-Stream Activated Sludge Hydrolysis Process

Lu Qin <sup>1,2</sup>, Dongqi Wang <sup>1,2,3,\*</sup>, Zhe Zhang <sup>2</sup>, Xiaoxiao Li <sup>2</sup>, Guodong Chai <sup>2</sup>, Yishan Lin <sup>4</sup>,  
Cong Liu <sup>2</sup>, Rui Cao <sup>2</sup>, Yuxin Song <sup>1,2</sup>, Haiyu Meng <sup>2</sup>, Zhe Wang <sup>2,3</sup>, Hui Wang <sup>2</sup>,  
Chunbo Jiang <sup>2,3</sup>, Yuan Guo <sup>2</sup>, Jiake Li <sup>2,3</sup> and Xing Zheng <sup>2,3,\*</sup>

- <sup>1</sup> National Demonstration Center for Experimental Water Resources and Hydro-Electric Engineering Education, Xi'an University of Technology, Xi'an 710048, China; 1170411051@stu.xaut.edu.cn (L.Q.); 2210420004@stu.xaut.edu.cn (Y.S.)
- <sup>2</sup> Department of Municipal and Environmental Engineering, Xi'an University of Technology, Xi'an 710048, China; 2170421281@stu.xaut.edu.cn (Z.Z.); 2170420048@stu.xaut.edu.cn (X.L.); 1190411045@stu.xaut.edu.cn (G.C.); 2180421296@stu.xaut.edu.cn (C.L.); 2180420032@stu.xaut.edu.cn (R.C.); hymeng@xaut.edu.cn (H.M.); wangzhewater@xaut.edu.cn (Z.W.); wanghui306@xaut.edu.cn (H.W.); chunbo@xaut.edu.cn (C.J.); guoyuan@xaut.edu.cn (Y.G.); sys@xaut.edu.cn (J.L.)
- <sup>3</sup> State Key Laboratory of Eco-Hydraulics in Northwest Arid Region, Xi'an University of Technology, Xi'an 710048, China
- <sup>4</sup> Shaanxi Key Laboratory of Earth Surface System and Environmental Carrying Capacity, College of Urban and Environmental Sciences, Northwest University, Xi'an 710127, China; yshanlisa@hotmail.com
- \* Correspondence: wangdq@xaut.edu.cn (D.W.); xingzheng@xaut.edu.cn (X.Z.)

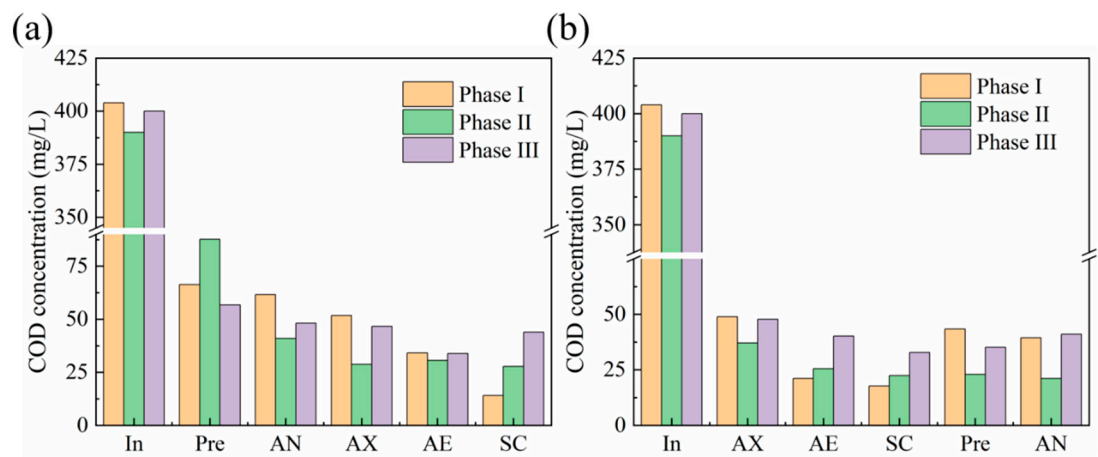

**Figure S1.** Profiles of COD concentrations in different tanks of A<sup>2</sup>O (a) and SSH (b) reactor during the experiment. In: Influent; Pre: pre-anoxic tank; AN: anaerobic tank; AX: anoxic tank; AE: aerobic tank; SC: clarifier tank.

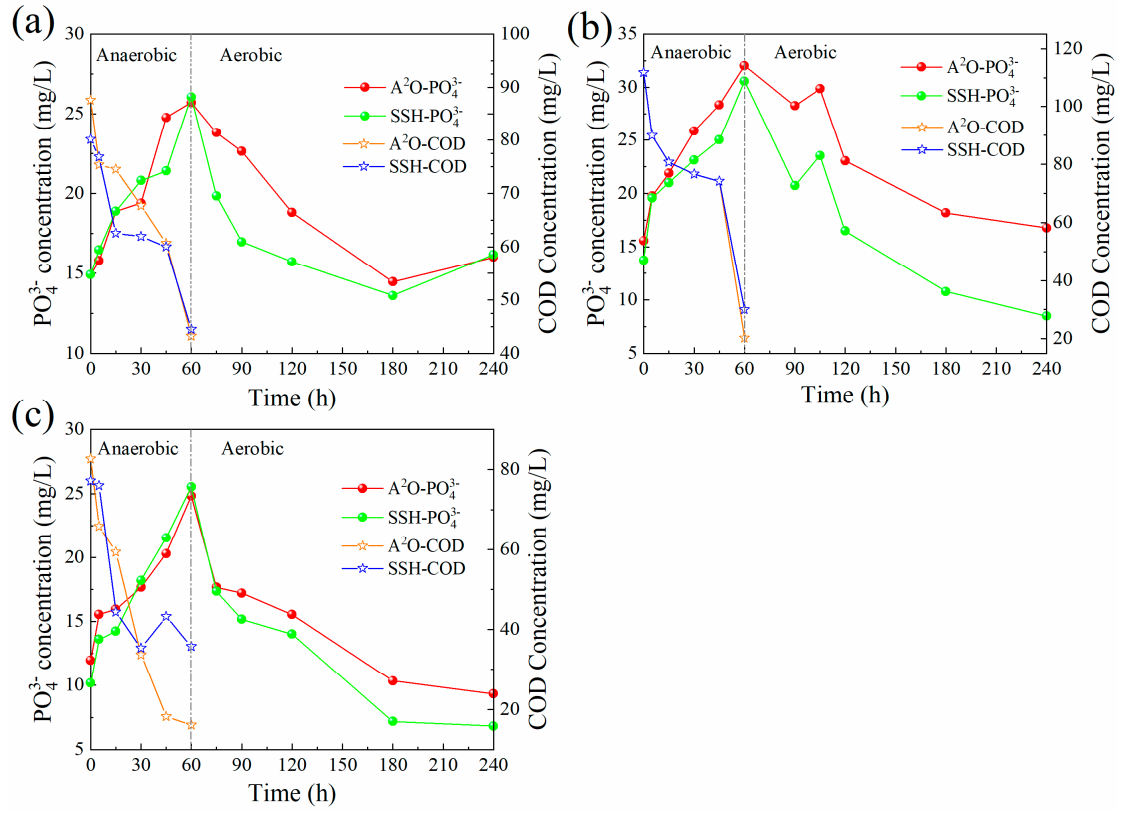

**Figure S2.** Profiles of COD and  $\text{PO}_4^{3-}$ -P during P release and uptake batch tests in (a) Phase I, (b) Phase II, and (c) Phase III.

Table S1. Phases and operational conditions of the A<sup>2</sup>O and SSH configurations during the experiment.

| Parameter                               | Phase I<br>(Days 1-15) |                   | Phase II<br>(Days 16-27) |                   | Phase II<br>(Days 28-45) |                   |
|-----------------------------------------|------------------------|-------------------|--------------------------|-------------------|--------------------------|-------------------|
|                                         | A <sup>2</sup> O       | SSH               | A <sup>2</sup> O         | SSH               | A <sup>2</sup> O         | SSH               |
| Pre-anoxic HRT (h)                      | 1.2                    | 8 <sup>a</sup>    | 1.2                      | 8 <sup>a</sup>    | 1.2                      | 8 <sup>a</sup>    |
| Anaerobic HRT (h)                       | 2.4                    | 16 <sup>a</sup>   | 2.4                      | 16 <sup>a</sup>   | 2.4                      | 16 <sup>a</sup>   |
| Anoxic HRT (h)                          | 2.4                    | 2.4               | 2.4                      | 2.4               | 2.4                      | 2.4               |
| Aerobic HRT (h)                         | 9.6                    | 9.6               | 9.6                      | 9.6               | 9.6                      | 9.6               |
| SRT (d)                                 | 8                      | 8(1) <sup>b</sup> | 8                        | 8(1) <sup>b</sup> | 8                        | 8(1) <sup>b</sup> |
| Influent flow rate (L/d)                | 40                     | 40                | 40                       | 40                | 40                       | 40                |
| Nitrified recycle ratio (% of influent) | 400                    | 400               | 400                      | 400               | 400                      | 400               |
| RAS rate<br>(% of influent)             | 50                     | 50                | 50                       | 50                | 50                       | 50                |
| RAS diversion to SSR (%)                | –                      | 30                | –                        | 30                | –                        | 30                |

SSR: side-stream reactors;

<sup>a</sup>: calculated based on 30% RAS flow rates;

<sup>b</sup>: numbers outside the parentheses are mainstream SRT, and inside are side-stream SRT, which equal to the side-stream HRT.

Table S2. The discharge limit of COD, N and P in China's Class 1A Discharge Standard for Municipal WWTPs (GB18918-2002)

| Index                                                 | Limit |
|-------------------------------------------------------|-------|
| COD (mg COD/L)                                        | 50    |
| NH <sub>4</sub> <sup>+</sup> -N (mg N/L) <sup>a</sup> | 5 (8) |
| TN (mg N/L)                                           | 15    |
| PO <sub>4</sub> <sup>3-</sup> -P (mg P/L)             | 0.5   |

<sup>a</sup> The value outside the bracket is the limit used when water temperature>12 °C, and value in the bracket is used when water temperature≤12 °C.

Table S3. The COD load consumed for EBPR in A<sup>2</sup>O and SSH configurations during the experiment  
(Unit: mg COD/d).

| Configuration    | Phase I | Phase II | Phase III |
|------------------|---------|----------|-----------|
| A <sup>2</sup> O | 1632    | 335      | 1894      |
| SSH              | 3610    | 1970     | 3850      |

Note: the COD load consumed for EBPR ( $COD_{EBPR}$ ) is calculated based on the equation:

$$COD_{EBPR} = f_{CP} \times (1 - Y_{obs}) \times \Delta P_{EBPR} = f_{CP} \times (1 - Y/(1 + K_d \times SRT)) \times (\Delta P - P_s \times X_v \times Q_w)$$

Where:

$f_{CP}$  is the coefficient of total COD consumption for P removal (including PAO biomass growth and respiration) (10.7 mg COD/mg P) [1];

$Y_{obs}$  is the observed growth yield coefficient for PAO (mg COD biomass/mg COD substrate);

$\Delta P_{EBPR}$  is the removed P via EBPR (mg P/d);

$Y$  is the true growth yield coefficient for PAO (0.45 mg COD biomass/mg COD substrate) ([2]);

$K_d$  is specific endogenous mass loss rate for PAO (0.04/d) [2];

$\Delta P$  is the total removed P (for biomass growth and polyP formation) (mg P/d);

$P_s$  is the P requirement for biomass growth (0.02 kg P/kg VSS) [3].

### **Supplementary References**

1. Grady, C.P.L.J., Daigger, G.T., Lim, H.C., 1999. Biological Wastewater Treatment, 2nd ed. Marcel Dekker, Inc., New York, NY.
2. Henze, M., van Loosdrecht, M.C.M., Ekama, G.A., Brdjanovic, D., 2008. Biological Wastewater Treatment: Principles, Modelling, and Design. IWA Publishing, London, UK.
3. Wentzel, M., Dold, P., Ekama, G., Marais, G., 1989. Enhanced polyphosphate organism cultures in activated sludge systems. Part III: Kinetic model. Water S. A. 15(2), 89-102.
